# Supplementary material
Source: PubMed Central journal article supplement (PMC6669355)
Supplement: wxx099_suppl_online_supplementary_material.pdf [file wxx099_suppl_online_supplementary_material.pdf]

## Online Supplementary Material

---

### **Differences among Thai agricultural worker health, working conditions and pesticide use by farm type**

Pornpimol Kongtip<sup>1</sup>, Noppanun Nankongnab<sup>1</sup>, Redeerat Mahaboonpeeti<sup>2</sup>, Sasivimol Bootskeaw<sup>3</sup>, Kiattisak Batsungnoen<sup>4</sup>, Chalalai Hanchenlaksh<sup>4</sup>, Mathuros Tipayamongkholgul<sup>5</sup>, Susan Woskie<sup>6</sup>

<sup>1</sup>Department of Occupational Health and Safety, Faculty of Public Health, Mahidol University, 420/1 Rajvidhi Road, Bangkok 10400, Thailand, Center of Excellence on Environmental Health and Toxicology, CHE, Ministry of Education, Thailand.

<sup>2</sup>Faculty of Public health, Naresuan University, Tha Pho, Muang, Phitsanulok 65000, Thailand

<sup>3</sup>Faculty of Medicine, Payao University, 19 Maega, Muang, Payao 56000, Thailand

<sup>4</sup>Institute of Medicine, Suranaree Institute of Technology, 111 University Road, Muang, Nakhon Ratchasima 30000, Thailand

<sup>5</sup>Department of Epidemiology, Faculty of Public Health, Mahidol University, 420/1 Rajvidhi Road, Bangkok 10400, Thailand

<sup>6</sup>Department of Public Health, University of Massachusetts Lowell, One University Ave, Lowell, MA 01854-2867 USA

**Supplement Table 1. Number and percentage of pesticides reported by farm type. Percent calculated as the number of reports of pesticide group or chemical used out of total reports for type of pesticide (insecticide, herbicide, fungicide)**

| Pesticide type and sub group      | Chemical name                | Hazard classification by WHO | Rice farmers (n=44) | Flower farmers (n=77) | Vegetable farmers (n=165) | Rice & vegetable farmers (n=70) | Flower & vegetable farmers (n=68) | p-value |
|-----------------------------------|------------------------------|------------------------------|---------------------|-----------------------|---------------------------|---------------------------------|-----------------------------------|---------|
| <b>Insecticide</b>                |                              |                              |                     |                       |                           |                                 |                                   |         |
| Pyrethroid                        | Beta-cyfluthrin              | Ib                           | 7(13.5)             | 1(2.8)                | 17(9.3)                   | 14(15.9)                        | 1(2.9)                            |         |
|                                   | lambda-Cyhalothrin           | II                           | 8(15.4)             | 1(2.8)                | 14(7.7)                   | 6(6.8)                          | 1(2.9)                            |         |
|                                   | Cypermethrin                 | II                           | 1(1.9)              | -                     | 3(1.6)                    | 2(2.3)                          | -                                 |         |
|                                   | Total pyrethroid reports     |                              | 16(30.8)            | 2(5.6)                | 34(18.6)                  | 22(25)                          | 2(5.8)                            | <0.001  |
| Organophosphorus                  | Chlorpyrifos                 | II                           | -                   | -                     | 1(0.5)                    | 2(2.3)                          | 1(2.9)                            |         |
| Carbamate                         | Carbaryl                     | II                           | -                   | -                     | 4(2.2)                    | 1(0.5)                          | 1(2.9)                            |         |
|                                   | Carbosulfan                  | II                           | 2(3.8)              | 3(8.3)                | 3(1.6)                    | 1(0.5)                          | -                                 |         |
|                                   | Carbofuran                   | Ib                           | 7(13.5)             | 8(22.2)               | 27(14.8)                  | 12(13.6)                        | 3(8.6)                            |         |
|                                   | Total carbamate reports      |                              | 9(17.3)             | 11(30.5)              | 34(18.6)                  | 14(14.6)                        | 4(11.5)                           | 0.077   |
| Bacterium                         | bacillus thuringensis        | III                          | 1(1.9)              | 1(2.8)                | 9(4.9)                    | 7(8)                            | -                                 |         |
| Thiocarbamate                     | Cartap hydrochloride         | II                           | 6(11.5)             |                       | 17(9.3)                   | 3(3.4)                          | 1(2.9)                            |         |
| Benzoylurea                       | Chlorfluazuron               | U                            | 5(9.6)              | 4(11.1)               | 19(10.4)                  | 13(14.8)                        | 1(2.9)                            |         |
| Other                             |                              |                              | 15(28.8)            | 19(52)                | 68(37.2)                  | 27(30.7)                        | 26(74.3)                          |         |
| Total insecticide use reports (%) |                              |                              | 52(26.3%)           | 37(24.5%)             | 182(28.7%)                | 88(25.2%)                       | 35(22.6%)                         | <0.001  |
| <b>Herbicide</b>                  |                              |                              |                     |                       |                           |                                 |                                   |         |
| Pyrimidinyloxybenzoic             | Bispyribac-sodium            | III                          | 13(13)              | 9(9.2)                | 12(4.0)                   | 15(11.2)                        | 5(5.1)                            |         |
| Phenoxyacetic acid                | 2,4 - D sodium salt          | II                           | 28(28)              | 23(23.4)              | 64(21.4)                  | 35(26.0)                        | 18(18.3)                          |         |
| Bipyridylum                       | Paraquat dichloride          | II                           | 20(20)              | 34(34.7)              | 113(37.8)                 | 32(23.9)                        | 37(37.8)                          |         |
| Chloroacetanilide                 | Alachlor                     | II                           | 4(4)                | -                     | 20(6.7)                   | 4(3.0)                          | -                                 |         |
|                                   | Butachlor                    | III                          | 2(2)                | -                     | 2(0.7)                    | 4(3)                            | -                                 |         |
| Glycine derivative                | Glyphosate isopropylammonium | III                          | 26(26)              | 21(37.3)              | 64(21.4)                  | 31(23.1)                        | 22(22.4)                          |         |

| Pesticide type and sub group    | Chemical name               | Hazard classification by WHO | Rice farmers (n=44) | Flower farmers (n=77) | Vegetable farmers (n=165) | Rice & vegetable farmers (n=70) | Flower & vegetable farmers (n=68) | p-value |
|---------------------------------|-----------------------------|------------------------------|---------------------|-----------------------|---------------------------|---------------------------------|-----------------------------------|---------|
| Anillide+Thiocarbamate          | Propanil+Thiobencarb        | II + II                      | 5(5)                | 1(1)                  | 3(1)                      | 2(1.5)                          | 2(2)                              |         |
| 1,3,5-triazine                  | Ametryn                     | II                           | -                   | -                     | 1(0.3)                    | -                               | 1(1)                              |         |
| Aryloxyphenoxypropionate        | Quizalofop-P-ethyl          | II                           | -                   | 1(1)                  | 3(1)                      | 3(2.2)                          | -                                 |         |
| Urea                            | Diuron                      | III                          | -                   | 1(1.0)                | -                         | -                               | -                                 |         |
| Other                           |                             |                              | 2(2)                | 8(8.2)                | 16(5.4)                   | 6(4.5)                          | 13(13.3)                          |         |
| Total herbicide use reports (%) |                             |                              | 100(50.5%)          | 98(64.9%)             | 298(46.9%)                | 132(44.9%)                      | 98(63.2%)                         | <0.001  |
| <b>Fungicide</b>                |                             |                              |                     |                       |                           |                                 |                                   |         |
| Triazole                        | Azoxystrobin+difenconazole  | U + II                       | 11(23.9)            | -                     | 14(9.0)                   | 19(25.7)                        | 1(4.5)                            |         |
|                                 | Difenoconazole              | II                           | 6(13)               | 8(50)                 | 38(24.5)                  | 14(18.9)                        | 16(72.7)                          |         |
|                                 | Propiconazole+difenconazole | II + II                      | 23(50)              | -                     | 25(16.1)                  | 9(12.2)                         | 1(4.5)                            |         |
|                                 | Total triazole reports      |                              | 40(86.9)            | 8(50)                 | 77(49.6)                  | 42(56.6)                        | 18(81.7)                          | <0.001  |
| Strobilurin                     | Azoxystrobin                | U                            | -                   | 3(18.8)               | 21(13.5)                  | 13(17.6)                        | -                                 |         |
| Alkylenebis (dithiocarbamate)   | Mancozeb                    | U                            | 1(2.2)              | -                     | 7(4.5)                    | 2(2.7)                          | -                                 |         |
| Inorganic                       | Copper hydroxide            | II                           | 1(2.2)              | -                     | 6(3.9)                    | 2(2.7)                          | -                                 |         |
| Dicarboximide                   | Iprodione                   | III                          | -                   | -                     | 6(3.9)                    | -                               | 1(4.5)                            |         |
| Other                           |                             |                              | 4(8.7)              | 5(31.2)               | 38(24.5)                  | 15(20.3)                        | 3(13.6)                           |         |
| Total fungicide reports (%)     |                             |                              | 46(23.2%)           | 16(10.6%)             | 155(24.4%)                | 74(25.2%)                       | 22(14.2%)                         | <0.001  |

WHO recommended classification of pesticides by hazard; Ib = Highly hazardous; II = Moderately hazardous;

III = slightly hazardous; U = Unlikely to present acute hazard in normal use

Rice Farmers: The frequency of insecticide used varied from two to four times a year (11 %) up to one to four times a week to (4%). While for herbicides they reported applying two to four times/year (23%) up to once/month (2%). Fungicide use was reported as two to four times/year (48%) up to once/month (5%) The most commonly reported insecticides used were pyrethroids (31%) and carbamates (17%). The most commonly reported herbicides were 2, 4 D sodium salts (28%) and glyphosate (26%). The most common fungicides were triazoles (87%) (Supplement Table 1)

Flower Farmers: the frequency of insecticide application varied from once/month (53.2%) to two to four times/year (40.3%). While for herbicides they reported applying two to four times/year (41.6%) up to once/month (48.1%). Fungicide use was reported as two to four times/year (22.1%) up to once/month (68.8%). The most common insecticides were carbamates (30.5%). The most common herbicides were glyphosate (37.3%) followed by paraquat (34.7%). The most common fungicides were triazoles (50%) (Supplement Table 1).

Vegetable Farmers: The frequency of using insecticide varied from two to four times a year (17.8%) to five to seven times a week (1.4%). While for herbicides they reported applying two to four times/year (26.7%) up to five to seven times a week (1%). Fungicide use was reported as two to four times/year (22.4%) up to once/month (18.4%). The most commonly reported insecticides used were pyrethroids (18.6%) and carbamates (18.6%). The most commonly reported herbicides were paraquat (37.8%) followed by 2, 4 D sodium salts and glyphosate (21.4% each). The most common fungicides were triazoles (49.6%) (Supplement table 1)

Rice/vegetable Farmers: The frequency of using insecticide varied from two to four times a year (25.8%) to five to seven times a week (3.2%). While for herbicides they reported applying two to four times/year (35.4%) up to five to seven times a week (2.4%). Fungicide use was reported as two to four times/year (24.1%) up to one to four times/week (3.4%). The types of pesticides reported were more similar to rice farmers than vegetable farmers, with a higher % of pyrethroid insecticide use reported (25%), less paraquat herbicide use reported (23.9%) and a high use of triazole fungicide use reported (75.7%)

Flowers/vegetable Farmers: The frequency of insecticide used varied from two to four times a year (39.7%) to two to four times a month (1.7%). They used herbicide two to four times a year (52.8%) to once a month (47.2%). Fungicide use was reported as two to four times/year (14%) up to once a month (86%). The pattern of pesticide use was a mixture of what was seen with single crop farmers. Overall they used less insecticides, with pyrethoid use making up 5.8% of the insecticides reported and carbamates 11.5%. They had the highest percentage of uncategorized insecticide use (74.3%). Types of insecticide used depending on types of insects destroying plants. Like vegetable farmers, the most commonly reported herbicide was paraquat (37.8%) but even more than either flower or vegetable farmers they almost exclusively used triazoles as their fungicide (81.7%) (Supplement Table 1).
